# Supplementary material for: Venous thromboembolism incidence and risk factors associated with immune checkpoint inhibitors among patients with advanced non-small cell lung cancer
Source: PubMed Central journal article supplement — J Immunother Cancer. 2023 Jan 19;11(1):e006072. doi: 10.1136/jitc-2022-006072 (PMC9853260; doi:10.1136/jitc-2022-006072), 2023-01-19
Supplement: jitc-2022-006072supp001.pdf [file jitc-2022-006072supp001.pdf]

**Supplementary Materials****Supplemental Table 1** VTE incidence by second-line therapy among patients without VTE during first-line therapy

|                                                                                                           | <b>Overall<br/>(n=986)</b> | <b>LOT2 ICI<br/>(n=345)</b> | <b>LOT2 chemotherapy<br/>(n=368)</b> | <b>LOT2 ICI plus<br/>chemotherapy<br/>(n=118)</b> |
|-----------------------------------------------------------------------------------------------------------|----------------------------|-----------------------------|--------------------------------------|---------------------------------------------------|
| Overall VTE incidence rate during entire follow-up period (95% CI), cases per 100 PY                      | 20.7                       | 17.6                        | 26.3                                 | 20.2                                              |
| PE                                                                                                        | 13.1                       | 12.9                        | 15.5                                 | 9.2                                               |
| DVT, lower extremity                                                                                      | 8.1                        | 6.4                         | 11.1                                 | 7.1                                               |
| DVT, upper extremity                                                                                      | 2.9                        | 1.7                         | 4.3                                  | 4.0                                               |
| Other                                                                                                     | 2.0                        | 1.4                         | 3.0                                  | 2.0                                               |
| Overall VTE incidence rate or anticoagulant within 3 days of venous ultrasound (95% CI), cases per 100 PY | 21.2                       | 18.4                        | 26.8                                 | 20.2                                              |
| Overall VTE cumulative incidence during 6 month follow-up period (95% CI), cases per 100 patients         | 10.1                       | 8.7                         | 13.0                                 | 9.3                                               |
| PE                                                                                                        | 6.5                        | 6.1                         | 8.2                                  | 3.4                                               |
| DVT, lower extremity                                                                                      | 4.0                        | 2.9                         | 5.2                                  | 5.1                                               |
| DVT, upper extremity                                                                                      | 1.4                        | 0.9                         | 2.2                                  | 1.7                                               |
| Other                                                                                                     | 1.1                        | 1.2                         | 1.4                                  | 0.9                                               |

CI, confidence interval; DVT, deep vein thrombosis; ICI, immune checkpoint inhibitor; LOT2, second-line therapy; PE, pulmonary embolism; PY, patient-years; VTE, venous thromboembolism.
